# Supplementary material
Source: Frontiers journal article supplement (https://www.frontiersin.org/articles/548443)
Supplement: Data_Sheet_1.PDF [file Data_Sheet_1.PDF]

*Online Supplementary Materials for*  
Measuring Complexity in Financial Data

Gaurang Singh Yadav\*      Apratim Guha<sup>†</sup>      Anindya S. Chakrabarti<sup>‡</sup>

July 16, 2020

---

\*Email: gaurangy@iima.ac.in. Indian Institute of Management, Vastrapur, Ahmedabad, Gujarat-380015, India.

<sup>†</sup>Email: apratim@xlri.ac.in. Production, Operations and Decision Sciences Area, XLRI, Xavier School of Management, Jamshedpur, Jharkhand-831001, India and Production and Quantitative Methods Area, Indian Institute of Management, Ahmedabad-380015, India

<sup>‡</sup>(corresponding author) Email: anindyac@iima.ac.in. Economics area, Indian Institute of Management, Vastrapur, Ahmedabad, Gujarat-380015, India.

# 1 Data description

*Source of data:* Center for Research in Security Prices (CRSP) database: <http://www.crsp.org/>; accessed through Wharton Research Data Services (WRDS)).

*Description of the data:* Daily stock price data from NASDAQ spanning over a period of 47 years, from 1972 to 2018. We denote the length of the entire data in terms of years by  $\mathbb{T}$  ( $\mathbb{T} = 47$ ). We have considered 4-year wide moving windows, viz., 1972-75, 1973-76 and so on till 2015-18 (windows are denoted by  $k = 1, 2, \dots, 44$ ).

*Stock selection:* In the analysis, For each window, we have calculated the market capitalization of all stocks at the end of the period and chosen top  $N = 300$ , with a restriction that the data for chosen stocks cannot have more than 5% missing values within a window (which we fill by zeros). This dataset covers pre-crisis, crisis and post-crisis periods (the crisis period was 2007-09). Due to missing data, the first window (1972-75) contains only 124 stocks.

*Description of each window:* The  $k$ -th window has a size of  $N \times T_k$  where  $N = 300$  (except the first one, where  $N = 124$ ).  $T_k$  varies within 1002-1011 as there roughly 250 trading days per year and each window covers four consecutive calendar years.

## 1.1 Constructing log return series

All the computational analysis have been conducted on the log-return data, obtained from each of the window data. For each window, we denote each price series by  $S_i^k(t)$  where  $i$  denotes the stock,  $t$  denotes the time period within a window and  $k$  denotes the window. A four-year long window has a roughly 1000 days (each year has slightly more than 250 trading days) denoted by  $T_k$ . Log-return data is defined as

$$G_i^k(t) = \log S_i^k(t+1) - \log S_i^k(t). \quad (1)$$

Next we normalize the log return as follows,

$$g_i^k(t) = \frac{G_i^k(t) - \langle G_i^k(t) \rangle}{\sigma_i^k} \quad (2)$$

where  $\langle . \rangle$  denotes the sample average and  $\sigma_i^k$  is the sample standard deviation of  $G_i^k$ .

## 2 Quantification of Linear and Nonlinear Relationships

In this section, the steps to compare the information content in linear and nonlinear relationships are explained. We have created the cross-correlation matrix to capture the linear relationship and mutual-information matrix to capture the non-linear relationship for each data-window.

## 2.1 Dominant Eigenvector of the Correlation-based Distance Matrix

1. For the  $k$ -th window, we have created the cross-correlation matrix of size  $300 \times 300$  (except for the 1972-75 window, which is of size  $124 \times 124$ ) from the normalised log-return matrix.

$$C_{ij}^k = \langle g_i^k(t) g_j^k(t) \rangle \quad (3)$$

2. Then we calculate the distance matrix using the following transformation proposed by [12],

$$d_{ij}^k = \sqrt{2(1 - C_{ij}^k)}. \quad (4)$$

3. Then we conduct an eigendecomposition of the distance matrix  $D_{ij}^k$  where  $k$  corresponds to the  $k^{th}$  window. Eigendecomposition of a square matrix  $D$  of size  $N \times N$  can be written as

$$D = V \Lambda V^{-1}. \quad (5)$$

Here,  $V$  is a square  $N \times N$  matrix whose  $i^{th}$  column is the  $i$ -th eigenvector  $v^i$  of  $M$  and  $\Lambda$  is the diagonal matrix whose diagonal elements are the corresponding eigenvalues,  $\Lambda_{ii} = \lambda_i$ .

## 2.2 Dominant eigenvector of the Mutual Information matrix

Let us first define Shannon entropy, joint entropy and mutual information.

**Definition 1** For the probability distribution  $p(x)$  of a discrete variable  $X$  defined over a domain  $[x_1, x_2 \dots x_N]$ , the **Shannon entropy** is given by [4],

$$H(X) = - \sum_i p(x_i) \log_2 p(x_i). \quad (6)$$

**Definition 2** For two discrete variables  $X$  and  $Y$  with probability distributions  $p(x)$  and  $p(y)$ , the **joint entropy** is given by [4],

$$H(X, Y) = - \sum_i \sum_j p(x_i, y_j) \log_2 p(x_i, y_j) \quad (7)$$

where  $p(x_i, y_j)$  denotes joint probability.

**Definition 3** For two variables  $X$  and  $Y$  having probability distributions  $p(x)$  and  $p(y)$ , **mutual information** is defined as [4],

$$I(X; Y) = \sum_{i,j} p(x_i, y_j) \log_2 \frac{p(x_i, y_j)}{p(y_j)p(x_i)}. \quad (8)$$

Now we are in a position to describe the steps.

1. For the  $k$ -th window, we construct mutual information matrix  $M^k$  from the log-return matrix, where element  $M_{ij}^k$  is defined as

$$M_{ij}^k = I(S_i^k; S_j^k). \quad (9)$$

where,  $S_i^k$  and  $S_j^k$  are log-returns of  $i^{th}$  and  $j^{th}$  stocks in  $k^{th}$  window and  $I()$  is mutual information defined above.

2. Then we conduct an eigendecomposition of the mutual information matrix  $M_{ij}^k$ , where  $k$  corresponds to the  $k^{th}$  window. Here, eigendecomposition of the square matrix  $M$  of size  $N \times N$  can be written as

$$M = V\Lambda V^{-1}. \quad (10)$$

Here,  $V$  is a square  $N \times N$  matrix whose  $i^{th}$  column is the  $i$ -th eigenvector  $v^i$  of the mutual information matrix  $M$  and  $\Lambda$  is the diagonal matrix whose diagonal elements are the corresponding eigenvalues,  $\Lambda_{ii} = \lambda_i$ .

### 2.3 Comparison Between Linear and Nonlinear Relationships

**Definition 4** *Linear regression is a linear model that captures the relationship between a response variable  $y$  and a set of explanatory variables  $x$ :*

$$y_i = \alpha + \beta x_i + \epsilon_i, \quad \text{for } i = 1, \dots, N, \quad (11)$$

where  $\alpha$  represents the intercept,  $\beta$  represents the slope and  $\epsilon$  represent the error term (also called noise).

We employ a regression framework to check for a relationship between the distance matrix and the mutual information matrix for each time window  $k$ . Note that each of them contain  $N^2$  number of elements where  $N = 300$ . Rather than comparing all the elements, we simply consider the dominant eigenvectors of the respective matrices since they explain a large part of the total variability of the empirical matrices. This choice is also motivated by the fact that the dominant eigenvector can be treated as the ‘*market mode*’ of these matrices [6].

1. We regress the dominant eigenvector of mutual information matrix on the dominant eigenvector of distance matrix. The regression specification is

$$v_i^{mi,k} = \alpha + \beta v_i^{D,k} + \epsilon_i, \quad \text{for } i = 1, \dots, N, \quad (12)$$

In Fig. 1 of the main text, we have plotted the evolution of  $R^2$  value (extracted from all windows).

2. Note that for calculating mutual information, one needs to discretize the data. In order to ensure the robustness of the results, the analysis has been done by converting each series into an ordinal categorical series with different bin classes denoted by  $b$ . We have done the analysis for  $b = 8, 12$  and  $16$ . As Fig. 1 in the main text shows, the results are nearly identical.

3. In tables 1, 2 and 3, we describe the summary of the regression results (intercept, slope, standard error of the slope coefficient,  $R^2$  and  $p$ -value of the slope).

### 3 Complexity through systemic risk

We construct *Granger causal network* (*GCN* hereafter) for each window of data (we have excluded the first window as the network size was not comparable with the rest). The network is constructed as follows.

1. The  $j$ -th asset's return is said to *Granger cause*  $i$ -th asset's return, if  $\beta_{ij}$  in the following regression is significant:

$$r_{it} = \alpha + \beta_{ii}r_{i,t-1} + \beta_{ij}r_{j,t-1} + \epsilon_{it}. \quad (13)$$

2. For each pair  $\{i, j\}$  of stocks, if the  $j$ -th stock *Granger causes* the  $i$ -th stock, then there exists an edge from  $j$  to  $i$ . We represent the edge by 1 and if there is no causation, we represent it by 0.
3. We have evaluated the existence of causal relationship at the standard 5% level of significance. All estimation exercises have been carried out using *lmtest* package in *R*.
4. Thus we get an  $N \times N$  matrix which is binary in nature. We call this the *Granger causal network* or *GCN* (denoted by  $G$ ) which has edges connecting pairs of nodes  $\{i, j\}$  described by  $\{g_{ij}\}$ .
5. Once the *GCN* is created, we find PageRank [7] of *GCN*. The PageRank vector of a network with adjacency matrix  $G$  is given by a vector  $v$  such that the  $j$ -th element satisfies

$$v_j = \frac{1 - \alpha}{N} + \alpha \sum_{k \in G(j)} \frac{g_{jk}v_k}{d_k} \quad (14)$$

where  $\alpha$  is a tuning parameter (a standard value is 0.15),  $d_k$  is the number of outbound links on  $j$  and  $G(j)$  is the neighborhood of node  $j$ .

This value represents a measure of risk. A high PageRank would indicate higher propensity of lagged movement with respect to other stocks. Thus this measure quantifies higher risk of spillover within the network.

We study the evolution of assets in *GCN*. A high dispersion in the PageRank would imply high inequality in influence across the stocks. In Fig. 2 in the main text, we present the time series of the standard deviation and differential entropy of the PageRank of *GCN* over all time windows. Differential entropy is defined as

$$\mathcal{E} = - \int p(x) \log \left( \frac{p(x)}{m(x)} \right) dx \quad (15)$$

where  $m(x)$  represents information invariance and measurement scale (see for example [5]).

Table 1: Results for regression with dominant eigenvectors of the mutual information matrix (number of bins= 8) and the distance matrix.

| Year    | Intercept | Slope   | Standard Error | R square | p-value    |
|---------|-----------|---------|----------------|----------|------------|
| 1972-75 | 1.149     | -11.828 | 1.433          | 0.358    | 2.117e-13  |
| 1973-76 | 0.02      | 0.44    | 1.977          | 0.0      | 0.824      |
| 1974-77 | 0.065     | -0.365  | 2.301          | 0.0      | 0.874      |
| 1975-78 | 0.286     | -4.171  | 2.591          | 0.009    | 0.108      |
| 1976-79 | 0.066     | -0.391  | 2.513          | 0.0      | 0.876      |
| 1977-80 | 0.622     | -9.913  | 1.474          | 0.132    | 9.040e-11  |
| 1978-81 | 0.796     | -12.972 | 1.787          | 0.15     | 3.386e-12  |
| 1979-82 | 1.001     | -16.603 | 2.227          | 0.157    | 9.831e-13  |
| 1980-83 | 1.585     | -26.848 | 2.467          | 0.284    | 1.916e-23  |
| 1981-84 | 1.543     | -25.988 | 2.277          | 0.304    | 2.828e-25  |
| 1982-85 | 1.532     | -25.68  | 1.592          | 0.466    | 1.673e-42  |
| 1983-86 | 1.769     | -29.799 | 2.233          | 0.374    | 3.665e-32  |
| 1984-87 | 0.959     | -15.701 | 0.633          | 0.674    | 1.654e-74  |
| 1985-88 | 0.943     | -15.419 | 0.608          | 0.683    | 2.169e-76  |
| 1986-99 | 0.847     | -13.762 | 0.601          | 0.638    | 1.234e-67  |
| 1987-90 | 0.621     | -9.826  | 0.489          | 0.575    | 2.541e-57  |
| 1988-91 | 0.753     | -12.126 | 0.97           | 0.344    | 3.990e-29  |
| 1989-92 | 0.786     | -12.689 | 1.122          | 0.3      | 6.406e-25  |
| 1990-93 | 0.797     | -12.902 | 1.141          | 0.3      | 6.629e-25  |
| 1991-94 | 0.892     | -14.557 | 1.509          | 0.238    | 2.401e-19  |
| 1992-95 | 0.646     | -10.287 | 1.881          | 0.091    | 9.606e-08  |
| 1993-96 | 0.77      | -12.428 | 1.817          | 0.136    | 4.461e-11  |
| 1994-97 | 0.937     | -15.313 | 1.466          | 0.268    | 5.719e-22  |
| 1995-98 | 1.077     | -17.729 | 0.956          | 0.536    | 1.297e-51  |
| 1996-09 | 1.08      | -17.783 | 0.888          | 0.574    | 4.200e-57  |
| 1997-00 | 0.938     | -15.312 | 0.57           | 0.707    | 1.619e-81  |
| 1998-01 | 0.882     | -14.369 | 0.408          | 0.806    | 2.841e-108 |
| 1999-02 | 0.798     | -12.928 | 0.409          | 0.771    | 2.952e-97  |
| 2000-03 | 0.671     | -10.741 | 0.292          | 0.819    | 1.016e-112 |
| 2001-04 | 0.621     | -9.904  | 0.227          | 0.865    | 1.239e-131 |
| 2002-05 | 0.638     | -10.212 | 0.243          | 0.856    | 2.260e-127 |
| 2003-06 | 0.747     | -12.103 | 0.365          | 0.787    | 5.983e-102 |
| 2004-07 | 0.742     | -11.971 | 0.439          | 0.714    | 5.408e-83  |
| 2005-08 | 0.343     | -5.002  | 0.216          | 0.644    | 9.517e-69  |
| 2006-09 | 0.319     | -4.602  | 0.18           | 0.686    | 6.712e-77  |
| 2007-10 | 0.281     | -3.939  | 0.157          | 0.68     | 1.193e-75  |
| 2008-11 | 0.244     | -3.296  | 0.142          | 0.643    | 1.098e-68  |
| 2009-12 | 0.284     | -4.018  | 0.149          | 0.709    | 8.222e-82  |
| 2010-13 | 0.334     | -4.895  | 0.149          | 0.784    | 2.858e-101 |
| 2011-14 | 0.334     | -4.901  | 0.196          | 0.677    | 4.294e-75  |
| 2012-15 | 0.446     | -6.852  | 0.266          | 0.69     | 7.491e-78  |
| 2013-16 | 0.43      | -6.569  | 0.263          | 0.677    | 3.334e-75  |
| 2014-17 | 0.41      | -6.211  | 0.304          | 0.584    | 9.844e-59  |
| 2015-18 | 0.397     | -5.988  | 0.258          | 0.645    | 6.480e-69  |

Table 2: Results for regression with dominant eigenvectors of the mutual information matrix (number of bins= 12) and the distance matrix.

| Year           | Intercept | Slope   | Standard Error | R square | p-value    |
|----------------|-----------|---------|----------------|----------|------------|
| <b>1972-75</b> | 0.852     | -8.509  | 1.317          | 0.255    | 2.225e-09  |
| <b>1973-76</b> | 0.372     | -5.53   | 1.281          | 0.059    | 2.164e-05  |
| <b>1974-77</b> | 0.436     | -6.642  | 1.406          | 0.07     | 3.577e-06  |
| <b>1975-78</b> | 0.655     | -10.444 | 1.705          | 0.112    | 2.861e-09  |
| <b>1976-79</b> | 0.48      | -7.434  | 1.732          | 0.058    | 2.402e-05  |
| <b>1977-80</b> | 0.668     | -10.655 | 1.132          | 0.229    | 1.330e-18  |
| <b>1978-81</b> | 0.845     | -13.741 | 1.316          | 0.268    | 5.731e-22  |
| <b>1979-82</b> | 1.019     | -16.78  | 1.492          | 0.298    | 1.072e-24  |
| <b>1980-83</b> | 1.509     | -25.35  | 1.746          | 0.414    | 1.706e-36  |
| <b>1981-84</b> | 1.502     | -25.165 | 1.571          | 0.463    | 4.207e-42  |
| <b>1982-85</b> | 1.381     | -23.037 | 1.507          | 0.44     | 2.391e-39  |
| <b>1983-86</b> | 1.624     | -27.274 | 2.093          | 0.363    | 5.110e-31  |
| <b>1984-87</b> | 0.834     | -13.525 | 0.607          | 0.625    | 1.938e-65  |
| <b>1985-88</b> | 0.814     | -13.169 | 0.582          | 0.632    | 1.181e-66  |
| <b>1986-89</b> | 0.733     | -11.764 | 0.56           | 0.597    | 9.573e-61  |
| <b>1987-90</b> | 0.511     | -7.909  | 0.484          | 0.473    | 2.432e-43  |
| <b>1988-91</b> | 0.587     | -9.226  | 0.955          | 0.239    | 2.174e-19  |
| <b>1989-92</b> | 0.621     | -9.82   | 1.095          | 0.213    | 3.331e-17  |
| <b>1990-93</b> | 0.619     | -9.795  | 1.101          | 0.21     | 5.741e-17  |
| <b>1991-94</b> | 0.711     | -11.405 | 1.458          | 0.17     | 8.897e-14  |
| <b>1992-95</b> | 0.498     | -7.709  | 1.784          | 0.059    | 2.110e-05  |
| <b>1993-96</b> | 0.617     | -9.763  | 1.715          | 0.098    | 3.004e-08  |
| <b>1994-97</b> | 0.787     | -12.699 | 1.358          | 0.227    | 2.145e-18  |
| <b>1995-98</b> | 0.912     | -14.864 | 0.877          | 0.491    | 1.444e-45  |
| <b>1996-99</b> | 0.9       | -14.645 | 0.797          | 0.531    | 5.750e-51  |
| <b>1997-00</b> | 0.803     | -12.968 | 0.497          | 0.695    | 6.355e-79  |
| <b>1998-01</b> | 0.768     | -12.374 | 0.347          | 0.81     | 2.008e-109 |
| <b>1999-02</b> | 0.706     | -11.297 | 0.331          | 0.796    | 8.072e-105 |
| <b>2000-03</b> | 0.602     | -9.517  | 0.217          | 0.866    | 2.953e-132 |
| <b>2001-04</b> | 0.55      | -8.639  | 0.178          | 0.887    | 3.155e-143 |
| <b>2002-05</b> | 0.572     | -9.021  | 0.185          | 0.889    | 4.991e-144 |
| <b>2003-06</b> | 0.666     | -10.656 | 0.29           | 0.819    | 8.580e-113 |
| <b>2004-07</b> | 0.678     | -10.847 | 0.376          | 0.736    | 3.082e-88  |
| <b>2005-08</b> | 0.31      | -4.42   | 0.181          | 0.666    | 6.073e-73  |
| <b>2006-09</b> | 0.288     | -4.038  | 0.151          | 0.707    | 1.843e-81  |
| <b>2007-10</b> | 0.256     | -3.494  | 0.13           | 0.707    | 2.480e-81  |
| <b>2008-11</b> | 0.226     | -2.977  | 0.119          | 0.677    | 4.476e-75  |
| <b>2009-12</b> | 0.263     | -3.632  | 0.13           | 0.723    | 5.910e-85  |
| <b>2010-13</b> | 0.303     | -4.328  | 0.123          | 0.805    | 8.682e-108 |
| <b>2011-14</b> | 0.303     | -4.328  | 0.166          | 0.694    | 1.049e-78  |
| <b>2012-15</b> | 0.414     | -6.264  | 0.23           | 0.713    | 1.048e-82  |
| <b>2013-16</b> | 0.39      | -5.838  | 0.221          | 0.701    | 4.274e-80  |
| <b>2014-17</b> | 0.369     | -5.478  | 0.251          | 0.615    | 8.922e-64  |
| <b>2015-18</b> | 0.353     | -5.194  | 0.213          | 0.666    | 6.365e-73  |

Table 3: Results for regression with dominant eigenvectors of the mutual information matrix (number of bins= 16) and the distance matrix.

| <b>Year</b>    | Intercept | Slope   | Standard Error | R square | p-value    |
|----------------|-----------|---------|----------------|----------|------------|
| <b>1972-75</b> | 0.708     | -6.909  | 1.291          | 0.19     | 4.142e-07  |
| <b>1973-76</b> | 0.442     | -6.714  | 1.078          | 0.115    | 1.621e-09  |
| <b>1974-77</b> | 0.498     | -7.69   | 1.176          | 0.126    | 2.671e-10  |
| <b>1975-78</b> | 0.709     | -11.36  | 1.485          | 0.164    | 2.828e-13  |
| <b>1976-79</b> | 0.574     | -9.039  | 1.5            | 0.109    | 4.917e-09  |
| <b>1977-70</b> | 0.653     | -10.39  | 1.001          | 0.265    | 9.726e-22  |
| <b>1978-81</b> | 0.828     | -13.426 | 1.142          | 0.317    | 1.743e-26  |
| <b>1979-82</b> | 0.97      | -15.9   | 1.195          | 0.373    | 5.175e-32  |
| <b>1980-83</b> | 1.362     | -22.736 | 1.344          | 0.49     | 1.870e-45  |
| <b>1981-84</b> | 1.432     | -23.931 | 1.391          | 0.498    | 1.446e-46  |
| <b>1982-85</b> | 1.284     | -21.352 | 1.493          | 0.407    | 1.136e-35  |
| <b>1983-86</b> | 1.532     | -25.658 | 2.025          | 0.35     | 1.027e-29  |
| <b>1984-87</b> | 0.76      | -12.228 | 0.622          | 0.564    | 1.037e-55  |
| <b>1985-88</b> | 0.736     | -11.819 | 0.598          | 0.567    | 3.597e-56  |
| <b>1986-89</b> | 0.663     | -10.538 | 0.586          | 0.521    | 1.665e-49  |
| <b>1987-90</b> | 0.436     | -6.605  | 0.505          | 0.365    | 3.294e-31  |
| <b>1988-91</b> | 0.501     | -7.745  | 0.974          | 0.175    | 3.843e-14  |
| <b>1989-92</b> | 0.514     | -7.975  | 1.11           | 0.148    | 5.486e-12  |
| <b>1990-93</b> | 0.534     | -8.315  | 1.098          | 0.161    | 4.716e-13  |
| <b>1991-94</b> | 0.612     | -9.685  | 1.438          | 0.132    | 8.500e-11  |
| <b>1992-95</b> | 0.425     | -6.445  | 1.746          | 0.044    | 0.000265   |
| <b>1993-96</b> | 0.538     | -8.395  | 1.674          | 0.078    | 9.062e-07  |
| <b>1994-97</b> | 0.663     | -10.558 | 1.356          | 0.169    | 1.151e-13  |
| <b>1995-98</b> | 0.816     | -13.186 | 0.883          | 0.428    | 5.154e-38  |
| <b>1996-09</b> | 0.804     | -12.982 | 0.792          | 0.474    | 1.762e-43  |
| <b>1997-00</b> | 0.719     | -11.492 | 0.494          | 0.645    | 5.882e-69  |
| <b>1998-01</b> | 0.681     | -10.854 | 0.334          | 0.78     | 6.181e-100 |
| <b>1999-02</b> | 0.612     | -9.652  | 0.316          | 0.758    | 1.030e-93  |
| <b>2000-03</b> | 0.54      | -8.425  | 0.199          | 0.857    | 4.205e-128 |
| <b>2001-04</b> | 0.503     | -7.795  | 0.159          | 0.889    | 2.047e-144 |
| <b>2002-05</b> | 0.521     | -8.116  | 0.168          | 0.887    | 3.472e-143 |
| <b>2003-06</b> | 0.602     | -9.518  | 0.268          | 0.809    | 4.335e-109 |
| <b>2004-07</b> | 0.604     | -9.53   | 0.34           | 0.725    | 1.561e-85  |
| <b>2005-08</b> | 0.284     | -3.959  | 0.165          | 0.659    | 1.159e-71  |
| <b>2006-09</b> | 0.264     | -3.618  | 0.138          | 0.698    | 1.446e-79  |
| <b>2007-10</b> | 0.239     | -3.186  | 0.12           | 0.701    | 3.506e-80  |
| <b>2008-11</b> | 0.211     | -2.71   | 0.109          | 0.673    | 2.163e-74  |
| <b>2009-12</b> | 0.244     | -3.288  | 0.117          | 0.725    | 1.392e-85  |
| <b>2010-13</b> | 0.276     | -3.852  | 0.111          | 0.803    | 4.051e-107 |
| <b>2011-14</b> | 0.281     | -3.939  | 0.153          | 0.689    | 1.316e-77  |
| <b>2012-15</b> | 0.37      | -5.489  | 0.206          | 0.704    | 8.534e-81  |
| <b>2013-16</b> | 0.353     | -5.179  | 0.203          | 0.687    | 3.974e-77  |
| <b>2014-17</b> | 0.336     | -4.893  | 0.233          | 0.597    | 1.084e-60  |
| <b>2015-18</b> | 0.327     | -4.727  | 0.201          | 0.65     | 6.220e-70  |



## 4 Algorithmic Information Theory-based Measures

In this section, the steps to compute the algorithmic complexity of the stocks-returns using MDS scaling, have been explained.

1. For each data-window, we have created the cross-correlation matrix of size  $300 \times 300$  (except for the 1972 – 75 window, which is of size  $124 \times 124$ ) using,

$$C_{ij}^k = \langle g_i^k(t)g_j^k(t) \rangle . \quad (16)$$

2. Then we have calculated the dissimilarity matrix of size  $300 \times 300$  (except for the 1972 – 75 window, which is of size  $124 \times 124$ ) using the correlation matrix, using the following equation,

$$d_{ij}^{sk} = 1 - C_{ij}^k \quad (17)$$

where  $d_{ij}^{sk}$  is the element in dissimilarity matrix  $D^S$  for  $k^{th}$  window. Note that this is not the same as the distance matrix given by Eqn. 4. Note that all elements of the  $D^{sk}$  matrix for all  $k$  now have to be within 0 and 2.

3. Then we projected the values on binary 2D plane using clustering technique (multi-dimensional scaling). For that, we calculate the 2D co-ordinates of the projected values (using Euclidean distance), fixing the angle of rotation for all of the windows. This step (fixing the rotation) is important since otherwise the code randomly rotates the projection on the 2 dimensional plane and that distorts the computation of the complexity measure.
4. We map these points on  $300 \times 300$  grid ( $124 \times 124$  for the first window). Assigning the 1 to the cell if there are corresponding data-points within that cell, and 0 to the rest of the cells.
5. Then we calculated the algorithmic complexity of this binary grid, using BDM module (a *python* package) for 2 symbol, 2D array. Available at <https://pypi.org/project/pybdm/>.
6. Calculate the same for all the windows and plot the corresponding evolution of the complexity measure over the entire time period in Fig. 3 in the main paper.

## 5 Interactive Dynamics: Complexity Through Heterogeneity

In this part, the estimate heterogeneity in the interaction strength across assets. This heterogeneity is argued to capture complexity in the system.

1. First, we consider vector autoregression model with lag 1:

$$X_t = \hat{\Gamma} X_{t-1} + \epsilon_t \quad (18)$$

where  $X_t$  represents log return series,  $\Gamma$  represents the interaction matrix and  $\epsilon_t$  represents error term. Note that in this set up  $X_t$  is a vector of size  $N \times 1$  where  $N = 300$  and  $\Gamma$  is a matrix of size  $300 \times 300$ .

2. We estimate this VAR model on the  $k$ -th window (using the `stats.linregress` module of `python` available at [https://www.statsmodels.org/dev/vector\\_ar.html](https://www.statsmodels.org/dev/vector_ar.html)) for all  $k$ .
3. After estimating the interaction matrix  $\Gamma$ , the standard deviation of the estimated parameters in the  $\Gamma$  matrix is calculated. We call this parameter  $\sigma$  and it represents the heterogeneity interactions across stocks. For extracting the elements of the  $\hat{\Gamma}$  matrix, we had to employ `vars` package in `R` (`stats.linregress` package does not allow extraction of the interaction matrix).
4. We plot the evolution of the standard deviation parameter over the available data-length. Fig. 4 presents the evolution of the degree of heterogeneity in the interaction strengths of stocks.
5. Summary of the results of the VAR estimations are given in table 4. Num. of days ( $T$ ) represents the number of days within each window for which we estimate the model. By construction, it is slightly above 1000 days for each stock (corresponding to 4 years' longitudinal data in each window). We also present the loglikelihood measure along with three information criteria (Akaike, Bayesian and Hannan-Quinn).

## References

- [1] Borg, I. and Groenen, P. (2003). Modern multidimensional scaling: Theory and applications. *Journal of Educational Measurement*, 40(3):277–280.
- [2] Calude, C. S., Salomaa, K., and Roblot, T. K. (2011). Finite state complexity. *Theoretical Computer Science*, 412(41):5668–5677.
- [3] Cilibrasi, R. and Vitányi, P. M. (2005). Clustering by compression. *IEEE Transactions on Information theory*, 51(4):1523–1545.
- [4] Cover, T. M. and Thomas, J. A. (2012). *Elements of information theory*. John Wiley & Sons.
- [5] Frank, S. A. and Smith E. (2011). A simple derivation and classification of common probability distributions based on information symmetry and measurement scale. *Journal of Evolutionary Theory*, 24:469–484.
- [6] Kuyyamudi, C., Chakrabarti, A. S., and Sinha, S. (2019). Emergence of frustration signals systemic risk. *Physical Review E*, 99(5):052306.
- [7] Newman, M. (2018). *Networks*. Oxford university press.
- [8] Pedregosa, F., Varoquaux, G., Gramfort, A., Michel, V., Thirion, B., Grisel, O., Blondel, M., Prettenhofer, P., Weiss, R., Dubourg, V., Vanderplas, J., Passos, A., Cournapeau, D., Brucher, M., Perrot, M., and Duchesnay, E. (2011). Scikit-learn: Machine learning in Python. *Journal of Machine Learning Research*, 12:2825–2830.

Table 4: Summary of the result for VAR estimations ( $N = 300$ ).

| Year    | Num. of days ( $T$ ) | Log likelihood | AIC      | BIC      | HQIC     |
|---------|----------------------|----------------|----------|----------|----------|
| 1972-85 | 1008                 | 249051.06      | -815.29  | -739.7   | -786.57  |
| 1973-76 | 1009                 | 847905.24      | -2353.06 | -1913.04 | -2185.89 |
| 1974-77 | 1009                 | 872067.49      | -2400.95 | -1960.93 | -2233.79 |
| 1975-78 | 1008                 | 884220.04      | -2426.6  | -1986.23 | -2259.3  |
| 1976-79 | 1008                 | 888766.17      | -2435.62 | -1995.25 | -2268.32 |
| 1977-80 | 1008                 | 868455.86      | -2395.32 | -1954.96 | -2228.02 |
| 1978-81 | 1009                 | 865648.75      | -2388.23 | -1948.21 | -2221.06 |
| 1979-82 | 1010                 | 861156.86      | -2377.81 | -1938.14 | -2210.79 |
| 1980-83 | 1010                 | 831958.02      | -2319.99 | -1880.32 | -2152.97 |
| 1981-84 | 1010                 | 834343.79      | -2324.72 | -1885.05 | -2157.69 |
| 1982-85 | 1010                 | 820873.39      | -2298.04 | -1858.37 | -2131.02 |
| 1983-86 | 1010                 | 793303.97      | -2243.45 | -1803.78 | -2076.42 |
| 1984-87 | 1010                 | 780575.98      | -2218.25 | -1778.57 | -2051.22 |
| 1985-88 | 1010                 | 777923.27      | -2212.99 | -1773.32 | -2045.97 |
| 1986-89 | 1009                 | 790212.12      | -2238.7  | -1798.68 | -2071.54 |
| 1987-90 | 1009                 | 794435.93      | -2247.07 | -1807.05 | -2079.91 |
| 1988-91 | 1009                 | 781902.56      | -2222.23 | -1782.21 | -2055.07 |
| 1989-92 | 1010                 | 759536.33      | -2176.58 | -1736.91 | -2009.56 |
| 1990-93 | 1011                 | 744323.44      | -2145.18 | -1705.85 | -1978.29 |
| 1991-94 | 1010                 | 751615.68      | -2160.9  | -1721.23 | -1993.87 |
| 1992-95 | 1009                 | 742966.5       | -2145.05 | -1705.03 | -1977.89 |
| 1993-96 | 1009                 | 737347.94      | -2133.92 | -1693.9  | -1966.75 |
| 1994-97 | 1009                 | 745722.4       | -2150.52 | -1710.5  | -1983.35 |
| 1995-98 | 1009                 | 717267.15      | -2094.11 | -1654.09 | -1926.95 |
| 1996-99 | 1009                 | 670600.04      | -2001.61 | -1561.59 | -1834.45 |
| 1997-00 | 1007                 | 639061.65      | -1941.26 | -1500.54 | -1773.81 |
| 1998-01 | 1002                 | 647602.81      | -1963.74 | -1521.28 | -1795.59 |
| 1999-02 | 1003                 | 690594.27      | -2048.36 | -1606.25 | -1880.35 |
| 2000-03 | 1002                 | 718190.71      | -2104.64 | -1662.17 | -1936.49 |
| 2001-04 | 1002                 | 778859.22      | -2225.73 | -1783.27 | -2057.58 |
| 2002-05 | 1006                 | 818752.31      | -2299.58 | -1858.51 | -2131.99 |
| 2003-06 | 1005                 | 846233.71      | -2355.71 | -1914.3  | -2187.98 |
| 2004-07 | 1004                 | 857945.65      | -2380.54 | -1938.77 | -2212.67 |
| 2005-08 | 1005                 | 849217.43      | -2361.65 | -1920.23 | -2193.92 |
| 2006-09 | 1005                 | 838428.3       | -2340.18 | -1898.76 | -2172.45 |
| 2007-10 | 1006                 | 856462.82      | -2374.55 | -1933.49 | -2206.96 |
| 2008-11 | 1007                 | 877718.35      | -2415.25 | -1974.54 | -2247.81 |
| 2009-12 | 1005                 | 919092.36      | -2500.7  | -2059.29 | -2332.97 |
| 2010-13 | 1005                 | 948364.11      | -2558.95 | -2117.54 | -2391.23 |
| 2011-14 | 1005                 | 962470.09      | -2587.02 | -2145.61 | -2419.3  |
| 2012-15 | 1005                 | 985138.41      | -2632.14 | -2190.72 | -2464.41 |
| 2013-16 | 1006                 | 994160.95      | -2648.3  | -2207.24 | -2480.72 |
| 2014-17 | 1005                 | 1000336.59     | -2662.38 | -2220.97 | -2494.65 |
| 2015-18 | 1004                 | 1012073.34     | -2687.56 | -2245.8  | -2519.7  |

- [9] Shannon, C. E. (1948). A mathematical theory of communication. *Bell system technical journal*, 27(3):379–423.
- [10] Soler-Toscano, F., Zenil, H., Delahaye, J.-P., and Gauvrit, N. (2014). Calculating kolmogorov complexity from the output frequency distributions of small turing machines. *PloS one*, 9(5):e96223.
- [11] Zenil, H. and Delahaye, J.-P. (2011). An algorithmic information theoretic approach to the behaviour of financial markets. *Journal of Economic Surveys*, 25(3):431–463.
- [12] Mantegna, R. N. and Stanley, H. E. (1999). *Introduction to econophysics: correlations and complexity in finance*. Cambridge university press.
